# Supplementary material for: How do individual-level sociodemographics and neighbourhood-level characteristics influence residential location behaviour in the context of the food and built environment? Findings from 25 years of follow-up in the CARDIA Study
Source: PubMed Central journal article supplement — J Epidemiol Community Health. 2016 Sep 21;71(3):261–8. doi: 10.1136/jech-2016-207249 (PMC5318652; doi:10.1136/jech-2016-207249), 2016-09-21
Supplement: jech-2016-207249supp2.pdf [file jech-2016-207249supp2.pdf]

**SUPPLEMENTAL FILE 2**Descriptive statistics of z-score means by neighborhood cluster type <sup>a</sup>, pooled cities & CARDIA Exam Years 0-25

|                                                        | Exam Year 0  | Exam Year 10 | Exam Year 15 | Exam Year 25 | Exam Years 0-25 |
|--------------------------------------------------------|--------------|--------------|--------------|--------------|-----------------|
| <b>LOW CONNECTIVITY/AMENITIES</b>                      |              |              |              |              |                 |
| <b>CLUSTER [545 (23.2%)]</b>                           |              |              |              |              |                 |
| Total park area (km <sup>2</sup> ) <sup>b</sup>        | 1.19 (1.69)  | 1.08 (1.43)  | 1.05 (1.41)  | 1.14 (1.43)  | 1.11 (1.49)     |
| Intersection density <sup>c</sup>                      | -0.24 (0.79) | -0.25 (0.82) | -0.27 (0.83) | -0.29 (0.76) | -0.28 (0.79)    |
| Links (count) <sup>d</sup>                             | 1.81 (1.09)  | 1.81 (1.19)  | 1.81 (1.17)  | -0.45 (0.51) | 1.39 (1.40)     |
| Cul-de-sacs (count)                                    | 0.83 (1.14)  | 0.78 (1.13)  | 0.78 (1.15)  | -0.26 (0.75) | 0.59 (1.16)     |
| Beta index <sup>e</sup>                                | -0.27 (0.52) | -0.30 (0.55) | -0.31 (0.54) | -0.36 (0.50) | -0.29 (0.51)    |
| Total road length (km)                                 | 2.05 (1.09)  | 2.03 (1.21)  | 2.05 (1.18)  | 2.02 (1.35)  | 2.07 (1.18)     |
| Percentage residential <sup>f</sup>                    | 0.06 (0.66)  | 0.15 (0.62)  | 0.15 (0.64)  | 0.17 (0.68)  | 0.12 (0.65)     |
| Distance to nearest employment sub-center <sup>g</sup> | 0.12 (0.82)  | 0.21 (0.83)  | 0.65 (0.73)  | 0.70 (0.69)  | 0.32 (0.84)     |
| PA facilities <sup>h</sup>                             | -0.27 (0.44) | -0.32 (0.31) | -0.38 (0.20) | -0.36 (0.21) | -0.32 (0.33)    |
| Fast food restaurants (chain) <sup>h</sup>             | 0.19 (0.67)  | -0.25 (0.23) | -0.25 (0.27) | -0.21 (0.35) | -0.05 (0.50)    |
| Full-service restaurants <sup>h</sup>                  | -0.08 (0.26) | -0.34 (0.19) | -0.39 (0.19) | -0.31 (0.21) | -0.25 (0.27)    |
| Convenience stores <sup>h</sup>                        | -0.23 (0.38) | -0.26 (0.31) | -0.33 (0.29) | -0.25 (0.39) | -0.22 (0.38)    |
| Supermarkets <sup>h</sup>                              | 0.29 (0.55)  | -0.18 (0.23) | -0.49 (0.37) | -0.29 (0.24) | -0.13 (0.51)    |
| Co-ops <sup>h</sup>                                    | -0.26 (0.22) | -0.07 (0.27) | -0.26 (0.27) | -0.35 (0.27) | -0.26 (0.35)    |
| <b>AVERAGE CONNECTIVITY/AMENITIES</b>                  |              |              |              |              |                 |
| <b>CLUSTER [n=409 (17.4%)]</b>                         |              |              |              |              |                 |
| Total park area (km <sup>2</sup> ) <sup>b</sup>        | -0.33 (0.39) | -0.34 (0.34) | -0.33 (0.39) | -0.30 (0.41) | -0.32 (0.39)    |
| Intersection density <sup>c</sup>                      | 0.26 (0.57)  | 0.36 (0.63)  | 0.33 (0.62)  | 0.15 (0.66)  | 0.28 (0.60)     |
| Links (count) <sup>d</sup>                             | -0.06 (0.71) | -0.08 (0.69) | -0.09 (0.67) | -0.02 (0.53) | -0.06 (0.67)    |
| Cul-de-sacs (count)                                    | -0.38 (0.63) | -0.42 (0.54) | -0.40 (0.53) | -0.36 (0.76) | -0.39 (0.62)    |
| Beta index <sup>e</sup>                                | 0.09 (0.68)  | 0.05 (0.70)  | 0.05 (0.72)  | -0.02 (0.68) | 0.05 (0.70)     |
| Total road length (km)                                 | -0.08 (0.69) | -0.12 (0.66) | -0.12 (0.65) | -0.14 (0.64) | -0.09 (0.69)    |
| Percentage residential <sup>f</sup>                    | 0.23 (0.68)  | 0.26 (0.68)  | 0.24 (0.70)  | 0.29 (0.69)  | 0.26 (0.68)     |
| Distance to nearest employment sub-center <sup>g</sup> | -0.20 (0.83) | -0.12 (0.85) | 0.08 (0.88)  | 0.03 (0.85)  | -0.08 (0.84)    |

|                                            |              |              |              |              |              |
|--------------------------------------------|--------------|--------------|--------------|--------------|--------------|
| PA facilities <sup>h</sup>                 | -0.03 (0.79) | -0.05 (0.53) | -0.12 (0.45) | -0.16 (0.40) | -0.06 (0.62) |
| Fast food restaurants (chain) <sup>h</sup> | -0.10 (0.78) | -0.10 (0.69) | -0.12 (0.61) | -0.17 (0.53) | -0.09 (0.70) |
| Full-service restaurants <sup>h</sup>      | -0.11 (0.27) | -0.24 (0.39) | -0.20 (0.44) | -0.20 (0.42) | -0.17 (0.38) |
| Convenience stores <sup>h</sup>            | 0.14 (0.98)  | 0.07 (0.78)  | -0.04 (0.73) | -0.01 (0.70) | 0.04 (0.82)  |
| Supermarkets <sup>h</sup>                  | -0.04 (0.30) | -0.07 (0.71) | -0.06 (0.82) | -0.11 (0.70) | -0.07 (0.63) |
| Co-ops <sup>h</sup>                        | -0.07 (0.51) | -0.20 (0.34) | -0.22 (0.33) | -0.15 (0.47) | -0.15 (0.43) |

**HIGH CONNECTIVITY/AMENITIES  
CLUSTER [n=1398 (59.4%)]**

|                                                        |              |              |              |              |              |
|--------------------------------------------------------|--------------|--------------|--------------|--------------|--------------|
| Total park area (km <sup>2</sup> ) <sup>b</sup>        | 0.21 (1.07)  | 0.18 (1.04)  | 0.24 (1.07)  | 0.15 (1.03)  | 0.23 (1.09)  |
| Intersection density <sup>c</sup>                      | 0.90 (0.71)  | 0.68 (0.82)  | 0.76 (0.78)  | 0.80 (0.87)  | 0.83 (0.77)  |
| Links (count) <sup>d</sup>                             | 0.78 (1.13)  | 0.68 (1.10)  | 0.77 (1.09)  | 0.90 (1.01)  | 0.77 (1.05)  |
| Cul-de-sacs (count)                                    | -0.03 (0.67) | -0.08 (0.79) | -0.06 (0.76) | 0.13 (1.28)  | -0.03 (0.80) |
| Beta index <sup>e</sup>                                | 0.42 (1.05)  | 0.61 (1.13)  | 0.53 (1.04)  | 0.56 (1.04)  | 0.46 (1.05)  |
| Total road length (km)                                 | 0.48 (0.99)  | 0.43 (0.90)  | 0.51 (0.91)  | 0.36 (0.87)  | 0.45 (0.90)  |
| Percentage residential <sup>f</sup>                    | -0.47 (0.67) | -0.54 (0.72) | -0.49 (0.77) | -0.50 (0.72) | -0.48 (0.68) |
| Distance to nearest employment sub-center <sup>g</sup> | -1.00 (0.43) | -0.91 (0.44) | -0.91 (0.66) | -0.95 (0.57) | -0.93 (0.50) |
| PA facilities <sup>h</sup>                             | 1.23 (1.51)  | 1.31 (1.46)  | 1.53 (1.74)  | 1.14 (1.60)  | 1.33 (1.52)  |
| Fast food restaurants (chain) <sup>h</sup>             | 1.36 (1.44)  | 1.09 (1.34)  | 1.21 (1.52)  | 1.45 (1.84)  | 1.25 (1.45)  |
| Full-service restaurants <sup>h</sup>                  | 2.15 (2.38)  | 1.56 (2.01)  | 1.96 (2.10)  | 1.62 (1.87)  | 2.00 (2.14)  |
| Convenience stores <sup>h</sup>                        | 0.84 (0.97)  | 1.25 (1.21)  | 1.27 (1.26)  | 1.34 (1.32)  | 1.06 (1.13)  |
| Supermarkets <sup>h</sup>                              | 0.07 (1.41)  | 0.68 (1.31)  | 0.75 (1.21)  | 0.88 (1.41)  | 0.47 (1.35)  |
| Co-ops <sup>h</sup>                                    | 1.60 (2.83)  | 1.38 (2.11)  | 1.44 (1.96)  | 0.79 (1.59)  | 1.56 (2.31)  |

<sup>a</sup> Clusters created *a posteriori* clusters using non-hierarchical cluster analysis with 392 neighborhoods across 6 exam years (n=2352 neighborhoods) in the core 4 cities (Birmingham, AL; Chicago, IL; Minneapolis, MN; Oakland, CA)

<sup>b</sup> We calculated the total park area within the boundaries of each neighborhood, and excluded (clipped) any park area that extended beyond the boundaries. The park area outside of the boundaries would count toward the total park area in the adjacent neighborhood unit(s).

<sup>c</sup> Intersection density represents the number of 3-way, 4-way, and higher intersections per km<sup>2</sup>

<sup>d</sup> Number of connections between intersections

<sup>e</sup> Ratio of links to nodes (intersections)

<sup>f</sup> Percentage of roads used for local traffic

<sup>g</sup> Distance from neighborhood centroid to nearest employment center centroid (km)

<sup>h</sup> Count per km<sup>2</sup> land within neighborhood
